# Supplementary material for: A Computational Model Incorporating Neural Stem Cell Dynamics Reproduces Glioma Incidence across the Lifespan in the Human Population
Source: PubMed Central journal article supplement (PMC4237327; doi:10.1371/journal.pone.0111219), 2014-11-19

**A**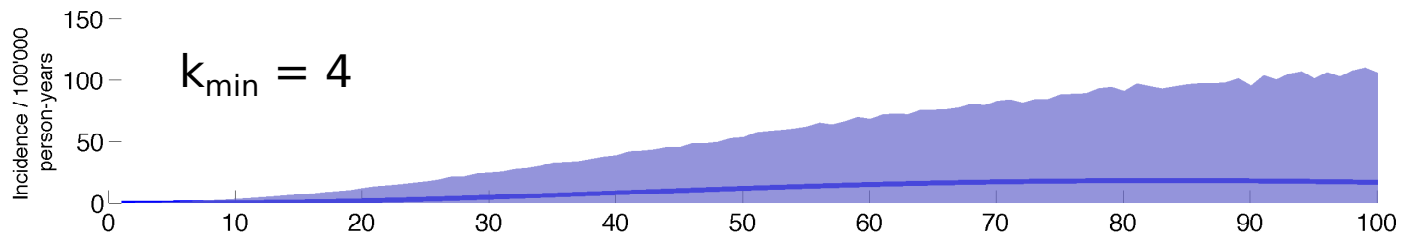**B**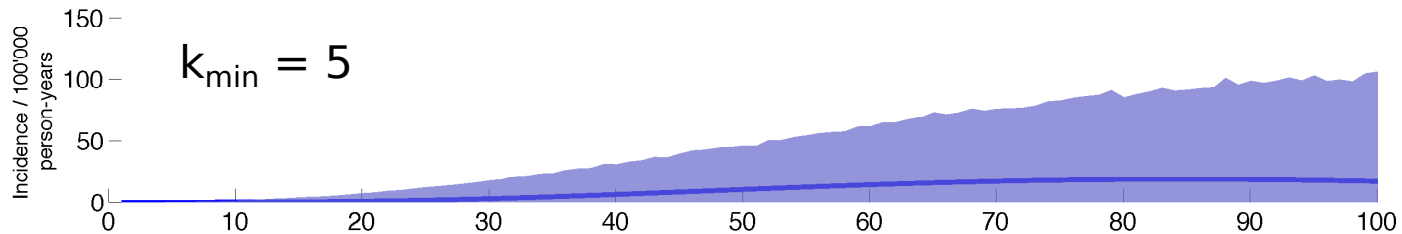**C**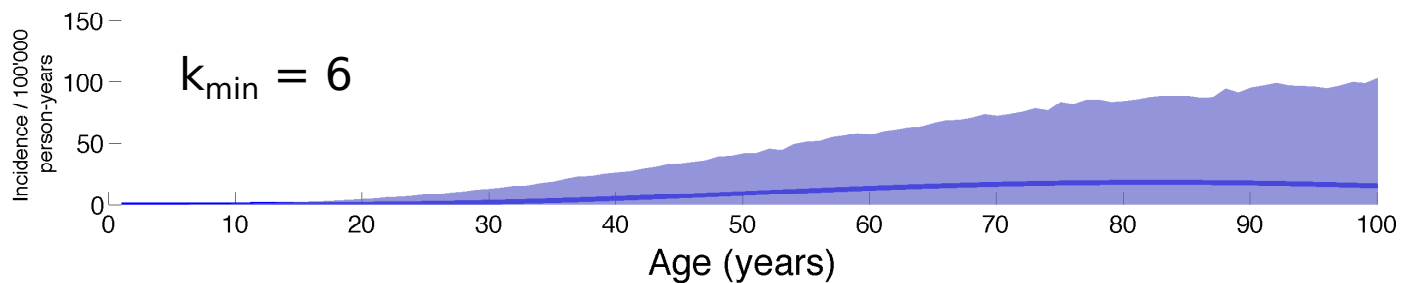

Supplement: pone.0111219.s001.pdf [file pone.0111219.s001.pdf]
