# Supplementary material for: A Computational Model Incorporating Neural Stem Cell Dynamics Reproduces Glioma Incidence across the Lifespan in the Human Population
Source: PubMed Central journal article supplement (PMC4237327; doi:10.1371/journal.pone.0111219), 2014-11-19
Supplement: pone.0111219.s003.pdf [file pone.0111219.s003.pdf]

**Table S1: Proto-oncogenes implicated in glioma formation**

| Symbol      | Name                                                      | GeneID | Chromosome | Chr Band     | Tumor Types (Somatic Mutations)                                                                               |
|-------------|-----------------------------------------------------------|--------|------------|--------------|---------------------------------------------------------------------------------------------------------------|
| APC         | adenomatous polyposis of the colon gene                   | 324    | 5          | 5q21         | colorectal, pancreatic, desmoid, hepatoblastoma, glioma, other CNS                                            |
| BRAF        | v-raf murine sarcoma viral oncogene homolog B1            | 673    | 7          | 7q34         | melanoma, colorectal, papillary thyroid, borderline ovarian, NSCLC, cholangiocarcinoma, pilocytic astrocytoma |
| CDKN2A      | cyclin-dependent kinase inhibitor 2A (p16(INK4a)) gene    | 1029   | 9          | 9p21         | melanoma, multiple other tumor types                                                                          |
| CDKN2a(p14) | cyclin-dependent kinase inhibitor 2A- p14ARF protein      | 1029   | 9          | 9p21         | melanoma, multiple other tumor types                                                                          |
| CDKN2C      | cyclin-dependent kinase inhibitor 2C (p18, inhibits CDK4) | 1031   | 1          | 1p32         | glioma, MM                                                                                                    |
| CIC         | capicua homolog                                           | 23152  | 19         | 19q13.2      | oligodendroglioma, soft tissue sarcoma                                                                        |
| COPEB       | core promoter element binding protein (KLF6)              | 1316   | 10         | 10p15        | prostate, glioma                                                                                              |
| CTNNB1      | catenin (cadherin-associated protein), beta 1             | 1499   | 3          | 3p22-p21.3   | colorectal, ovarian, hepatoblastoma, pleomorphic salivary gland adenoma, other tumor types                    |
| EGFR        | epidermal growth factor receptor                          | 1956   | 7          | 7p12.3-p12.1 | glioma, NSCLC                                                                                                 |
| ERBB2       | v-erb-b2 erythroblastic leukemia viral oncogene homolog 2 | 2064   | 17         | 17q21.1      | breast, ovarian, other tumor types, NSCLC, gastric                                                            |
| FUBP1       | far upstream element (FUSE) binding protein 1             | 8880   | 1          | 1p13.1       | oligodendroglioma                                                                                             |
| GOPC        | golgi associated PDZ and coiled-coil motif containing     | 57120  | 6          | 6q21         | glioblastoma                                                                                                  |
| H3F3A       | H3 histone, family 3A                                     | 3020   | 1          | 1q42.12      | glioma                                                                                                        |
| HIST1H3B    | histone cluster 1, H3b                                    | 3020   | 6          | 6p22.1       | glioma                                                                                                        |
| IDH1        | isocitrate dehydrogenase 1 (NADP+), soluble               | 3417   | 2          | 2q33.3       | glioblastoma                                                                                                  |

Table S1 (continued). Proto-oncogenes implicated in glioma formation

| Symbol   | Name                                                    | GeneID | Chromosome | Chr Band       | Tumor Types (Somatic Mutations)                                                       |
|----------|---------------------------------------------------------|--------|------------|----------------|---------------------------------------------------------------------------------------|
| IDH2     | socitrate dehydrogenase 2 (NADP+), mitochondrial        | 3418   | 15         | 15q26.1        | glioblastoma                                                                          |
| KIAA1549 | KIAA1549                                                | 57670  | 7          | 7q34           | pilocytic astrocytoma                                                                 |
| KRAS     | v-Ki-ras2 Kirsten rat sarcoma 2 viral oncogene homolog  | 3845   | 12         | 12p12.1        | pancreatic, colorectal, lung, thyroid, AML, other tumor types                         |
| MDM2     | Mdm2 p53 binding protein homolog                        | 4193   | 12         | 12q15          | sarcoma, glioma, colorectal, other tumor types                                        |
| MDM4     | Mdm4 p53 binding protein homolog                        | 4194   | 1          | 1q32           | glioblastoma, bladder, retinoblastoma                                                 |
| MYC      | v-myc myelocytomatosis viral oncogene homolog (avian)   | 4609   | 8          | 8q24.12-q24.13 | Burkitt lymphoma, amplified in other cancers, B-CLL                                   |
| NF1      | neurofibromatosis type 1 gene                           | 4763   | 17         | 17q12          | neurofibroma, glioma                                                                  |
| PIK3CA   | phosphoinositide-3-kinase, catalytic, alpha polypeptide | 5290   | 3          | 3q26.3         | colorectal, gastric, glioblastoma, breast                                             |
| PIK3R1   | phosphoinositide-3-kinase, regulatory subunit 1 (alpha) | 5295   | 5          | 5q13.1         | glioblastoma, ovarian, colorectal                                                     |
| PTEN     | phosphatase and tensin homolog gene                     | 5728   | 10         | 10q23.3        | glioma, prostate, endometrial                                                         |
| RAF1     | v-raf-1 murine leukemia viral oncogene homolog 1        | 5894   | 3          | 3p25           | pilocytic astrocytoma                                                                 |
| ROS1     | v-ros UR2 sarcoma virus oncogene homolog 1 (avian)      | 6098   | 6          | 6q22           | glioblastoma, NSCLC                                                                   |
| SRGAP3   | SLIT-ROBO Rho GTPase activating protein 3               | 9901   | 3          | 3p25.3         | pilocytic astrocytoma                                                                 |
| TP53     | tumor protein p53                                       | 7157   | 17         | 17p13          | breast, colorectal, lung, sarcoma, adrenocortical, glioma, multiple other tumor types |
